# Supplementary material for: Elucidation of Pelareorep Pharmacodynamics in A Phase I Trial in Patients with KRAS -Mutated Colorectal Cancer
Source: Oxford University Press journal article supplement (doi:10.1158/1535-7163.mct-19-1117), 2020-03-10
Supplement: 15357163mct191117-sup-233413_2_supp_6112988_q6vj2t.docx [file 15357163mct191117-sup-233413_2_supp_6112988_q6vj2t.docx]

**Supplementary Data**

**Supplementary Figure S1**

The figure represents the mean tumor volume of each of the four groups of animals that were xenografted with HCT116 cells namely control, irinotecan, pelareorep, and the combination. Error bars represents SEM.


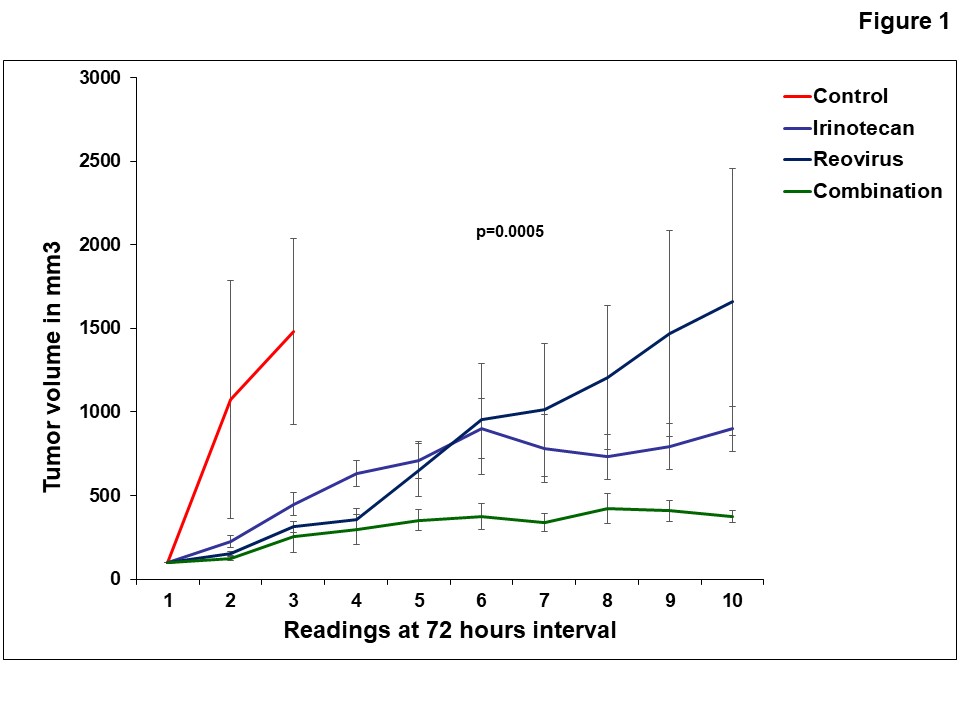


**Supplementary Figure S2**

This figure reflects the PFS and OS of all enrolled patients and those specifically at the RPTD.
